# Supplementary material for: Novel versatile europium and terbium complexes as bioprobes and anticancer agents
Source: Royal Society of Chemistry journal article supplement (doi:10.1039/d2nj03011j), 2022-01-01
Supplement: d2nj03011j1.pdf [file d2nj03011j1.pdf]

**NOVEL VERSATILE EUROPIUM AND TERBIUM COMPLEXES AS  
BIOPROBE AND ANTICANCER AGENTS**

***Supplemental Information***

***New Journal of Chemistry***

**Mário R. Felício<sup>a#</sup>, Pedro D. Vaz<sup>b</sup>, Carla D. Nunes<sup>a\*</sup> and Mariela M. Nolasco<sup>c\*</sup>**

<sup>a</sup> Institute of Molecular Sciences, Centro de Química Estrutural – FCUL, Departamento de Química e Bioquímica, Faculdade de Ciências da Universidade de Lisboa, 1749-016 Lisboa, Portugal.

<sup>b</sup> Champalimaud Centre for the Unknown, Champalimaud Foundation, Av. Brasília, 1400-038 Lisboa, Portugal.

<sup>c</sup> Chemistry Department and CICECO, University of Aveiro, 3810-193 Aveiro, Portugal.

Email:

\* Correspondence to:

Dr. Mariela M. Nolasco,

Chemistry Department and CICECO, University of Aveiro, 3810-193 Aveiro, Portugal

Or

Dr. Carla D. Nunes

Institute of Molecular Sciences, Centro de Química Estrutural – FCUL, Departamento de Química e Bioquímica, Faculdade de Ciências da Universidade de Lisboa, 1749-016 Lisboa, Portugal

# Current author affiliation: Instituto de Medicina Molecular, Faculdade de Medicina, Universidade de Lisboa, Portugal

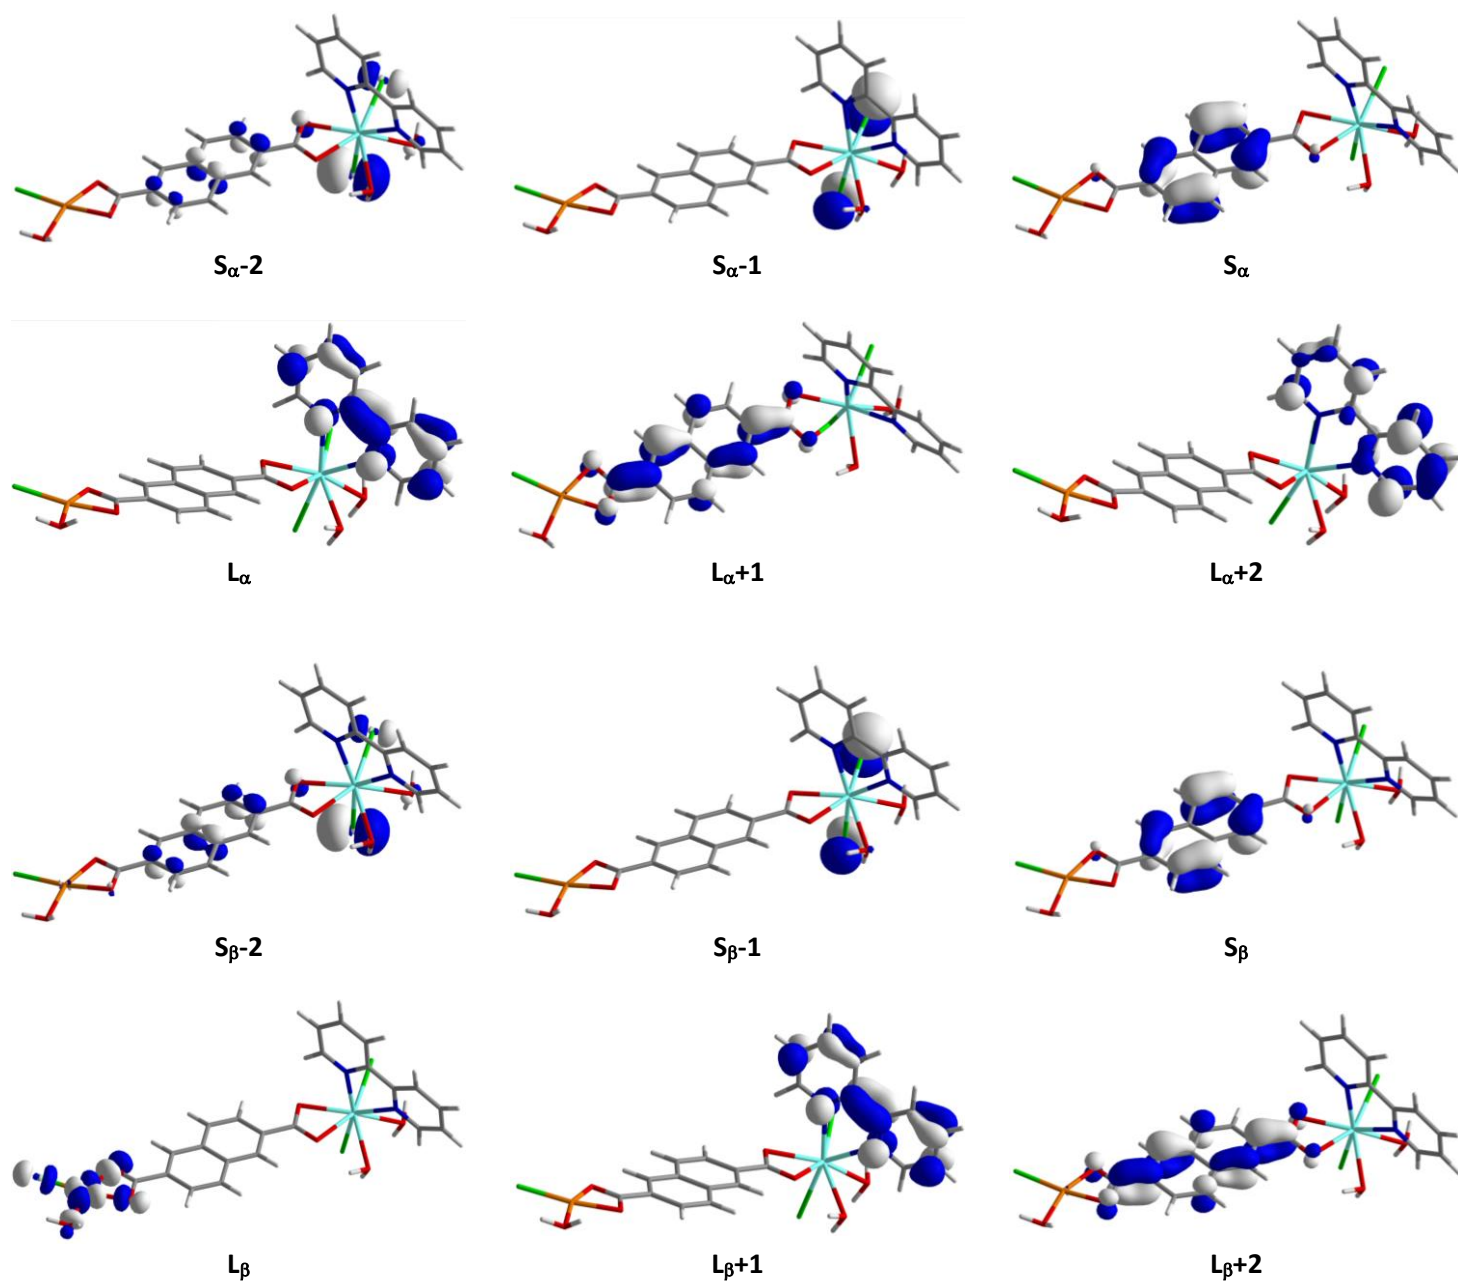

**Figure S1.** Frontier orbitals of complex **C3** from G09/B3PW91 for both  $\alpha$  (top) and  $\beta$  (bottom) densities (S = Single Highest Occupied Molecular Orbital, SOMO; L = Lowest Occupied Molecular Orbital, LUMO).

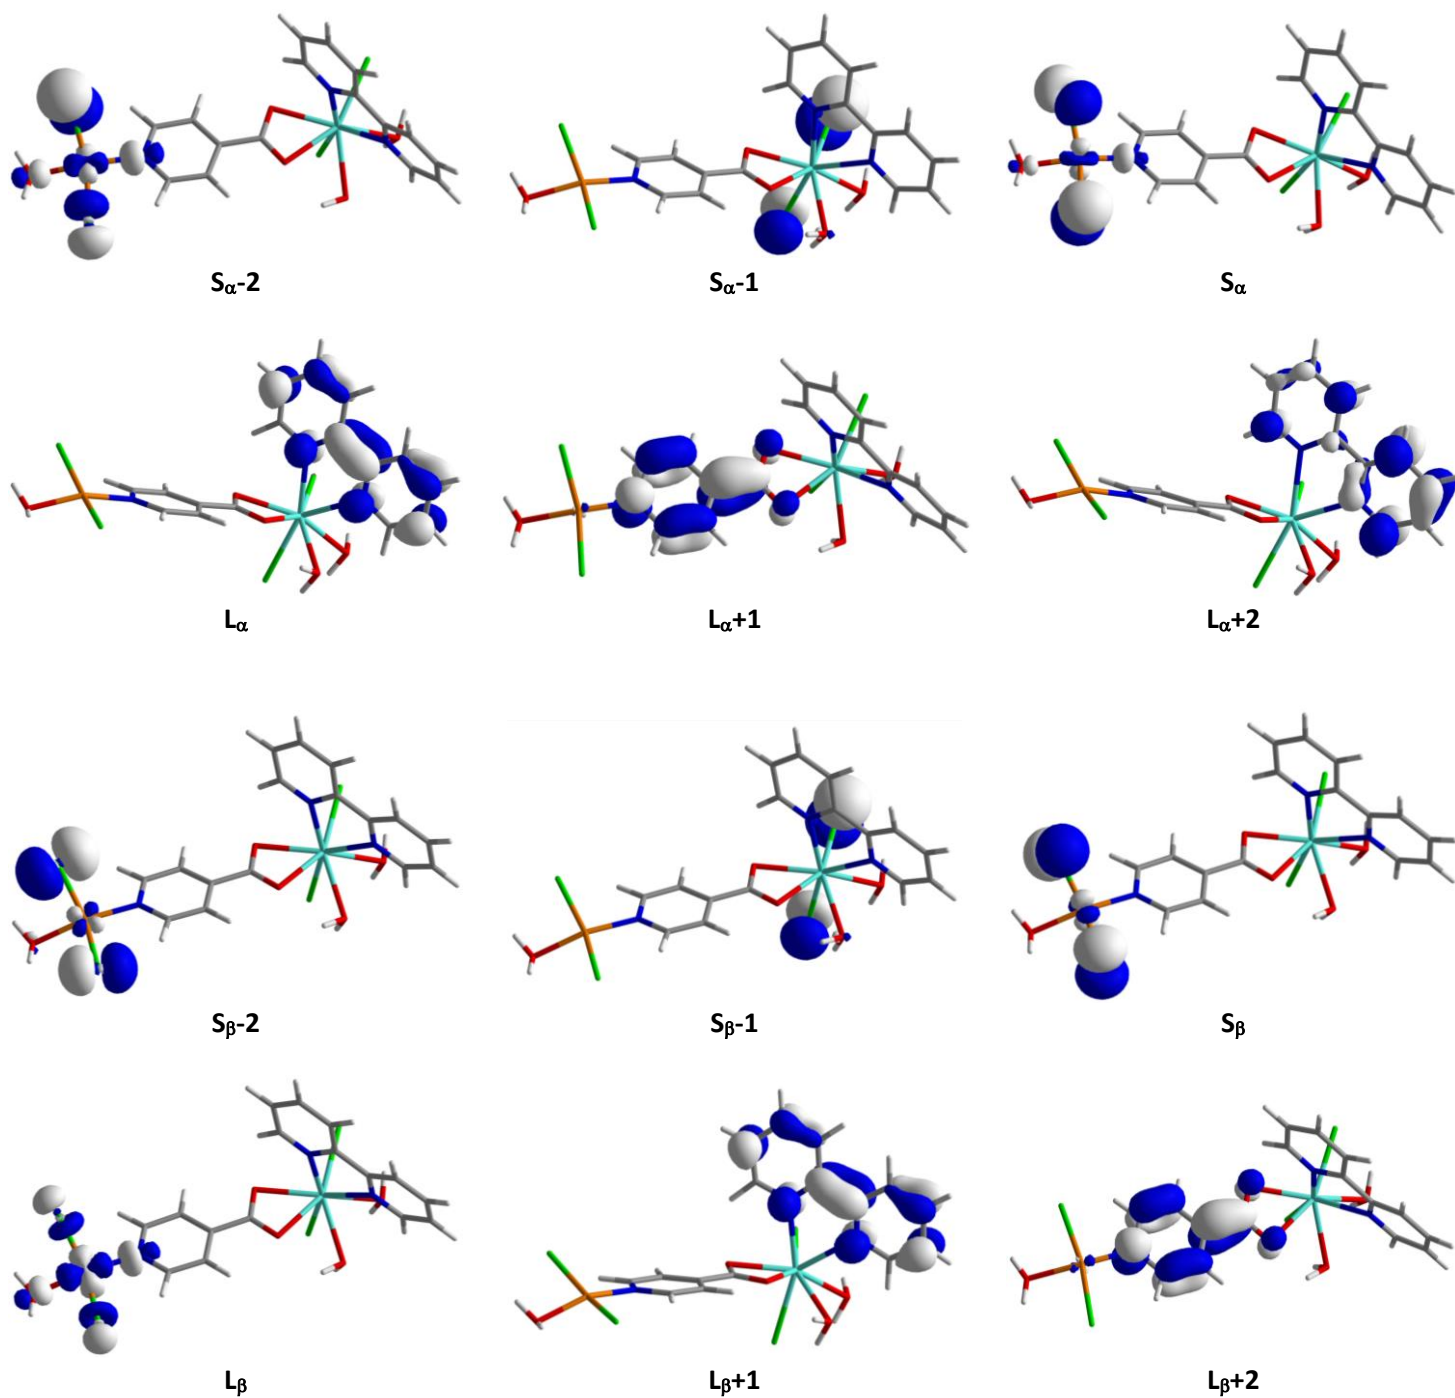

**Figure S2.** Frontier orbitals of complex **C4** from G09/B3PW91 for both  $\alpha$  (top) and  $\beta$  (bottom) densities (S = Single Highest Occupied Molecular Orbital, SOMO; L = Lowest Occupied Molecular Orbital, LUMO).

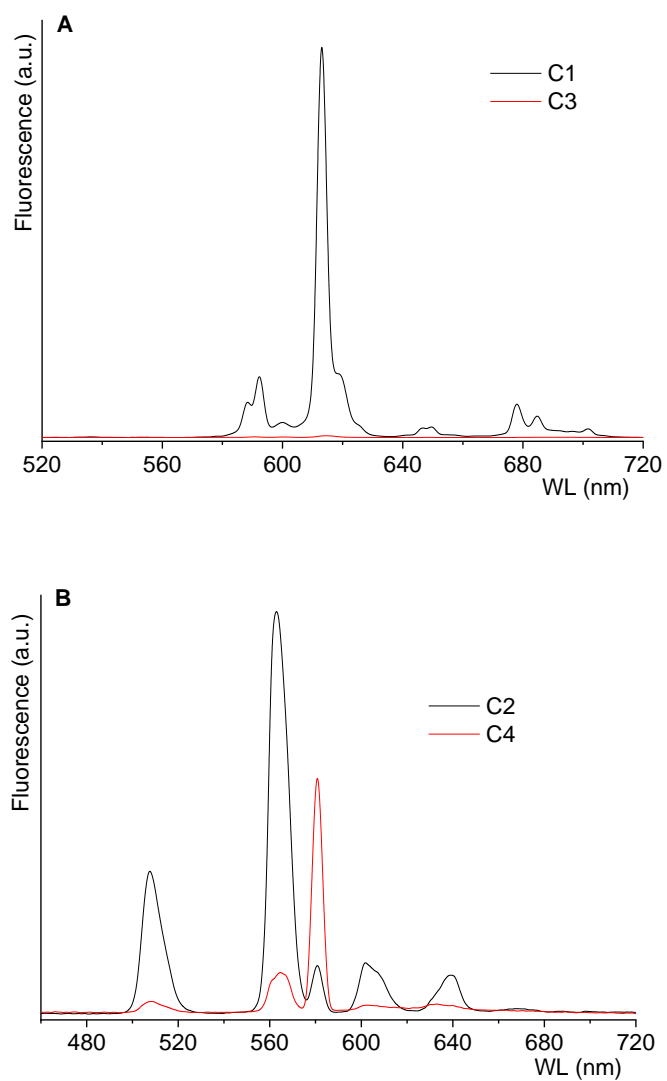

**Figure S3.** Fluorescence intensity spectra of methanolic solutions of (A) Europium mono- (**C1**) and bimetallic (**C3**) complexes with excitation wavelength of 300 nm. (B) Terbium mono- (**C2**) and bimetallic (**C4**) complexes with excitation wavelength of 282 nm.

## ANOVA tests

All ANOVA tests run as single factor considering  $\alpha = 0.05$ , assuming “activity of complexes is equal” as the null hypothesis.

### HeLa cells

#### SUMMARY

| Groups    | Count | Sum     | Average  | Variance |
|-----------|-------|---------|----------|----------|
| <b>C1</b> | 9     | 9.4883  | 1.054256 | 0.682541 |
| <b>C3</b> | 9     | 134.701 | 14.96678 | 142.1478 |

#### ANOVA

| Source of Variation | SS       | df | MS       | F        | P-value  | F crit   |
|---------------------|----------|----|----------|----------|----------|----------|
| Between Groups      | 871.0122 | 1  | 871.0122 | 12.19646 | 0.003012 | 4.493998 |
| Within Groups       | 1142.643 | 16 | 71.41517 |          |          |          |
| Total               | 2013.655 | 17 |          |          |          |          |

Null hypothesis rejected:  $P\text{-value} < \alpha$  ;  $F > F_{crit}$

#### SUMMARY

| Groups    | Count | Sum     | Average  | Variance |
|-----------|-------|---------|----------|----------|
| <b>C2</b> | 9     | 13.017  | 1.446333 | 0.50074  |
| <b>C4</b> | 9     | 220.537 | 24.50411 | 480.8886 |

#### ANOVA

| Source of Variation | SS       | df | MS       | F        | P-value  | F crit      |
|---------------------|----------|----|----------|----------|----------|-------------|
| Between Groups      | 2392.475 | 1  | 2392.475 | 9.939876 | 0.006159 | 4.493998478 |
| Within Groups       | 3851.115 | 16 | 240.6947 |          |          |             |
| Total               | 6243.59  | 17 |          |          |          |             |

Null hypothesis rejected:  $P\text{-value} < \alpha$  ;  $F > F_{crit}$

A549 cells

SUMMARY

| Groups | Count | Sum      | Average  | Variance |
|--------|-------|----------|----------|----------|
| C1     | 9     | 289.9975 | 32.22194 | 511.0708 |
| C3     | 9     | 379.4584 | 42.16204 | 835.7729 |

ANOVA

| Source of Variation | SS       | df | MS       | F        | P-value  | F crit   |
|---------------------|----------|----|----------|----------|----------|----------|
| Between Groups      | 444.6247 | 1  | 444.6247 | 0.660247 | 0.428398 | 4.493998 |
| Within Groups       | 10774.75 | 16 | 673.4219 |          |          |          |
| Total               | 11219.37 | 17 |          |          |          |          |

Null hypothesis NOT rejected:  $P\text{-value} > \alpha$  ;  $F < F_{crit}$

SUMMARY

| Groups | Count | Sum      | Average  | Variance |
|--------|-------|----------|----------|----------|
| C2     | 9     | 71.03049 | 7.892277 | 39.49269 |
| C4     | 9     | 247.089  | 27.45433 | 623.8028 |

ANOVA

| Source of Variation | SS       | df | MS       | F        | P-value  | F crit   |
|---------------------|----------|----|----------|----------|----------|----------|
| Between Groups      | 1722.032 | 1  | 1722.032 | 5.192354 | 0.036753 | 4.493998 |
| Within Groups       | 5306.364 | 16 | 331.6477 |          |          |          |
| Total               | 7028.396 | 17 |          |          |          |          |

Null hypothesis rejected:  $P\text{-value} < \alpha$  ;  $F > F_{crit}$

## G09 optimized geometries

```
-----  
#p  b3pw91/gen  pop=regular  opt=(maxcyc=1000)  scfcyc=1000  
ginput  gfpri  pseudo=read  scf=tight  
-----
```

```
Eu-L1 complex (C1); E(RB3PW91) = -2366.53678900  
C      -1.148729000      3.028212000      2.689537000  
C      -3.345727000      2.124381000     -0.805124000  
C      -4.008648000      3.078287000     -1.578262000  
C      -4.734550000      2.674084000     -2.688777000  
C      -4.784139000      1.325223000     -3.007259000  
C      -4.085664000      0.435257000     -2.203859000  
N      -3.380290000      0.820129000     -1.135520000  
H      -3.955335000      4.128595000     -1.325529000  
H      -5.253529000      3.407685000     -3.296161000  
H      -5.342796000      0.960900000     -3.860542000  
H      -4.081951000     -0.627364000     -2.411215000  
C      -2.579518000      2.486309000      0.412442000  
C      -2.629946000      3.765920000      0.966091000  
C      -1.904440000      4.039136000      2.116352000  
C      -1.156616000      1.777708000      2.086534000  
N      -1.849670000      1.509945000      0.977110000  
H      -3.240824000      4.540276000      0.521824000  
H      -1.939056000      5.027936000      2.560545000  
H      -0.570077000      3.190456000      3.590553000  
H      -0.589353000      0.949724000      2.496653000  
Eu     -2.068051000     -0.983811000      0.178197000  
O      -4.236388000     -2.215769000     -0.465307000  
H      -4.694086000     -2.086265000      0.381613000  
H      -3.870461000     -3.115953000     -0.428610000  
O      -1.771538000     -1.608121000     -2.305610000  
H      -0.876375000     -1.247686000     -2.391657000  
H      -1.636069000     -2.554927000     -2.114517000  
Cl     -3.761024000     -0.873338000      2.266316000  
Cl     -1.581155000     -3.701603000     -0.116023000  
O       0.140829000     -0.354683000     -0.817170000  
C       0.735121000     -0.583843000      0.281664000  
O       0.079074000     -0.896068000      1.318857000  
C       2.216983000     -0.472842000      0.365052000  
C       2.937041000     -0.022919000     -0.718393000  
C       2.878651000     -0.828225000      1.565936000  
C       4.342422000      0.099932000     -0.651515000  
H       2.410515000      0.240439000     -1.629296000  
C       4.240198000     -0.723457000      1.658271000  
H       2.281220000     -1.189458000      2.394328000  
C       5.112510000      0.564705000     -1.747730000  
C       5.008412000     -0.256206000      0.561011000  
H       4.752646000     -1.000670000      2.574077000  
C       6.474238000      0.675578000     -1.656648000  
H       4.602423000      0.832361000     -2.667774000  
C       6.412343000     -0.132526000      0.627535000
```

|   |              |              |              |
|---|--------------|--------------|--------------|
| C | 7.134534000  | 0.323324000  | -0.453228000 |
| H | 7.058920000  | 1.030311000  | -2.496023000 |
| H | 6.941875000  | -0.397321000 | 1.536641000  |
| C | 8.607753000  | 0.427460000  | -0.304491000 |
| O | 9.224779000  | 0.147318000  | 0.693882000  |
| O | 9.216056000  | 0.879254000  | -1.422252000 |
| H | 10.160422000 | 0.906068000  | -1.217472000 |

Tb-L2 complex (C2); E(RB3PW91) = -2041.57495064

|    |              |              |              |
|----|--------------|--------------|--------------|
| C  | 0.108437000  | 3.519544000  | 1.956786000  |
| C  | -2.472177000 | 1.595680000  | -0.779122000 |
| C  | -3.455136000 | 2.252530000  | -1.520167000 |
| C  | -4.278903000 | 1.521462000  | -2.362906000 |
| C  | -4.105120000 | 0.148387000  | -2.450119000 |
| C  | -3.095950000 | -0.434986000 | -1.697624000 |
| N  | -2.295034000 | 0.265656000  | -0.887795000 |
| H  | -3.575656000 | 3.325125000  | -1.450572000 |
| H  | -5.046043000 | 2.022338000  | -2.943449000 |
| H  | -4.727663000 | -0.465757000 | -3.089017000 |
| H  | -2.910319000 | -1.500625000 | -1.734471000 |
| C  | -1.580944000 | 2.313007000  | 0.164270000  |
| C  | -1.789137000 | 3.648197000  | 0.511015000  |
| C  | -0.932248000 | 4.258087000  | 1.415252000  |
| C  | 0.245395000  | 2.193145000  | 1.570976000  |
| N  | -0.571989000 | 1.602729000  | 0.695279000  |
| H  | -2.618930000 | 4.206436000  | 0.098740000  |
| H  | -1.085200000 | 5.293996000  | 1.697568000  |
| H  | 0.798993000  | 3.948505000  | 2.672404000  |
| H  | 1.036311000  | 1.568292000  | 1.969752000  |
| O  | -2.327681000 | -2.635988000 | 0.403509000  |
| H  | -2.622616000 | -2.430576000 | 1.306138000  |
| H  | -1.780243000 | -3.435297000 | 0.487426000  |
| O  | -0.485464000 | -2.004234000 | -1.996814000 |
| H  | 0.256645000  | -1.505016000 | -2.367873000 |
| H  | -0.091615000 | -2.846379000 | -1.702034000 |
| Cl | -1.568779000 | -0.781548000 | 2.719604000  |
| Cl | 0.596475000  | -3.519561000 | 0.383553000  |
| O  | 1.340820000  | -0.150796000 | -1.226731000 |
| C  | 2.179366000  | -0.055707000 | -0.279908000 |
| O  | 1.840537000  | -0.287167000 | 0.914955000  |
| C  | 3.584973000  | 0.348391000  | -0.577326000 |
| C  | 3.961120000  | 0.732579000  | -1.861537000 |
| C  | 4.548725000  | 0.352898000  | 0.427441000  |
| C  | 5.281275000  | 1.109471000  | -2.078432000 |
| H  | 3.232229000  | 0.735232000  | -2.662918000 |
| C  | 5.842030000  | 0.743070000  | 0.099372000  |
| H  | 4.284009000  | 0.049631000  | 1.433209000  |
| H  | 6.620555000  | 0.753391000  | 0.858325000  |
| N  | 6.214482000  | 1.119904000  | -1.125173000 |
| H  | 5.608159000  | 1.418564000  | -3.068506000 |
| Tb | -0.407437000 | -0.966573000 | 0.334351000  |



```

-----
#p  ub3pw91/gen  pop=regular  opt=(maxcyc=1000)  scfcyc=1000
gfinput gfprint pseudo=read scf=tight
-----

```

```

Eu-L1-Cu complex (C3); E(UB3PW91) = -3099.99407133
C      -2.780703000      2.934660000      2.785205000
C      -5.017411000      2.238680000     -0.731930000
C      -5.637710000      3.244960000     -1.473373000
C      -6.382621000      2.908664000     -2.593907000
C      -6.493519000      1.573974000     -2.953827000
C      -5.834690000      0.628928000     -2.180378000
N      -5.111231000      0.948142000     -1.102435000
H      -5.537212000      4.283500000     -1.188466000
H      -6.868826000      3.683467000     -3.176757000
H      -7.069327000      1.261753000     -3.816317000
H      -5.879154000     -0.425661000     -2.421384000
C      -4.234470000      2.528067000      0.494403000
C      -4.225221000      3.791517000      1.086069000
C      -3.488059000      3.996428000      2.243075000
C      -2.846379000      1.704585000      2.144899000
N      -3.550454000      1.502411000      1.028481000
H      -4.799472000      4.606204000      0.665785000
H      -3.476760000      4.972112000      2.716477000
H      -2.195781000      3.042683000      3.690296000
H      -2.317942000      0.839695000      2.529933000
Eu     -3.877465000     -0.952522000      0.150825000
O      -6.099694000     -2.063483000     -0.521538000
H      -6.547814000     -1.940394000      0.331559000
H      -5.778858000     -2.981248000     -0.517254000
O      -3.611921000     -1.504446000     -2.353956000
H      -2.703204000     -1.178561000     -2.433508000
H      -3.514383000     -2.461687000     -2.194517000
Cl     -5.555839000     -0.838274000      2.249001000
Cl     -3.507816000     -3.675045000     -0.234688000
O      -1.641486000     -0.389250000     -0.830313000
C      -1.057883000     -0.674168000      0.260614000
O      -1.724207000     -0.991806000      1.288817000
C      0.428104000      -0.621559000      0.346549000
C      1.165964000      -0.179222000     -0.728008000
C      1.073552000      -1.022843000      1.541412000
C      2.574566000      -0.109309000     -0.657604000
H      0.650765000      0.119921000     -1.634270000
C      2.437788000      -0.968091000      1.638279000
H      0.461435000     -1.377144000      2.362009000
C      3.361769000      0.345289000     -1.747192000
C      3.224141000     -0.509169000      0.550643000
H      2.937872000     -1.279165000      2.549971000
C      4.725243000      0.407038000     -1.652001000
H      2.861852000      0.643701000     -2.663248000
C      4.631641000     -0.435105000      0.623801000
C      5.367300000      0.014338000     -0.451566000
H      5.333189000      0.751046000     -2.480086000
H      5.145139000     -0.732869000      1.531693000
C      6.834113000      0.086834000     -0.348104000

```

|    |              |              |              |
|----|--------------|--------------|--------------|
| O  | 7.446502000  | -0.254307000 | 0.709701000  |
| O  | 7.547483000  | 0.499402000  | -1.323861000 |
| Cu | 9.167840000  | 0.211783000  | -0.207954000 |
| O  | 10.541391000 | 0.620503000  | -1.673437000 |
| H  | 11.349500000 | 0.710150000  | -1.144254000 |
| H  | 10.412737000 | 1.435603000  | -2.170061000 |
| Cl | 10.826201000 | 0.048634000  | 1.218810000  |

Tb-L2-Cu complex (C4); E(UB3PW91) = -3235.85792727

|    |              |              |              |
|----|--------------|--------------|--------------|
| C  | -0.103726000 | 3.667208000  | 1.780912000  |
| C  | -2.674466000 | 1.449557000  | -0.733758000 |
| C  | -3.722913000 | 2.007080000  | -1.466225000 |
| C  | -4.544176000 | 1.182728000  | -2.220760000 |
| C  | -4.302953000 | -0.182927000 | -2.229451000 |
| C  | -3.229773000 | -0.664995000 | -1.494173000 |
| N  | -2.430151000 | 0.125932000  | -0.770491000 |
| H  | -3.896353000 | 3.074598000  | -1.457906000 |
| H  | -5.361850000 | 1.606175000  | -2.793840000 |
| H  | -4.921579000 | -0.867494000 | -2.796490000 |
| H  | -2.989306000 | -1.720156000 | -1.475230000 |
| C  | -1.786084000 | 2.268786000  | 0.125600000  |
| C  | -2.056488000 | 3.608362000  | 0.406016000  |
| C  | -1.203180000 | 4.315557000  | 1.240076000  |
| C  | 0.094930000  | 2.330942000  | 1.462540000  |
| N  | -0.717510000 | 1.646820000  | 0.652250000  |
| H  | -2.931735000 | 4.095571000  | -0.002146000 |
| H  | -1.404123000 | 5.356138000  | 1.470078000  |
| H  | 0.586342000  | 4.173286000  | 2.444711000  |
| H  | 0.934084000  | 1.775864000  | 1.865475000  |
| O  | -2.175879000 | -2.728147000 | 0.652534000  |
| H  | -2.455391000 | -2.517966000 | 1.558521000  |
| H  | -1.576067000 | -3.488303000 | 0.735061000  |
| O  | -0.542624000 | -2.050880000 | -1.873451000 |
| H  | 0.130610000  | -1.529416000 | -2.332225000 |
| H  | -0.068107000 | -2.847337000 | -1.568764000 |
| Cl | -1.461850000 | -0.701506000 | 2.835390000  |
| Cl | 0.813727000  | -3.366704000 | 0.475107000  |
| O  | 1.250300000  | -0.074389000 | -1.257953000 |
| C  | 2.103274000  | 0.096964000  | -0.341208000 |
| O  | 1.819941000  | -0.078065000 | 0.874248000  |
| C  | 3.491408000  | 0.530727000  | -0.703692000 |
| C  | 3.813408000  | 0.865880000  | -2.014299000 |
| C  | 4.481955000  | 0.610782000  | 0.269824000  |
| C  | 5.104243000  | 1.272455000  | -2.307420000 |
| H  | 3.062967000  | 0.808287000  | -2.792280000 |
| C  | 5.748451000  | 1.033766000  | -0.095990000 |
| H  | 4.259589000  | 0.346375000  | 1.295860000  |
| H  | 6.547314000  | 1.140205000  | 0.627206000  |
| N  | 6.053031000  | 1.358843000  | -1.362869000 |
| H  | 5.415681000  | 1.533251000  | -3.311628000 |
| Tb | -0.415038000 | -0.919607000 | 0.411983000  |
| Cu | 7.926890000  | 1.957423000  | -1.809212000 |
| Cl | 7.797288000  | 1.853488000  | -4.052315000 |
| Cl | 8.372004000  | 2.982299000  | 0.139526000  |
| O  | 9.967570000  | 1.768703000  | -2.042167000 |

|   |              |             |              |
|---|--------------|-------------|--------------|
| H | 10.141868000 | 2.023376000 | -2.958624000 |
| H | 10.347445000 | 2.432540000 | -1.450344000 |
